# Supplementary material for: Labelling of antibodies and detection by laser ablation inductively coupled plasma mass spectrometry : PART III. Optimization of antibody labelling for application in a Western blot procedure
Source: Royal Society of Chemistry journal article supplement (doi:10.1039/b905224k), 2009-01-01
Supplement: b905224k.pdf [file b905224k.pdf]

**Table 1 (ESI):** Buffer and stock solutions

---

*Buffer I:* 0.02 M tetrabutylammonium acetate, pH 5.5

1.2 g tetrabutylammonium acetate was dissolved in 150 mL bidistilled water. The pH was adapted by use of acetic acid. By addition of water a volume of 200 mL was always kept constant. The buffer was stored at 4 °C.

*Buffer II:* 0.1 M Tris-HCl, pH 7- 7.5

6.0 g Tris-HCl was dissolved in 400 mL bidistilled water. The pH was adapted by use of 6 N HCl. By addition of water a volume of 500 mL was always kept constant.

*Buffer III:* Carbonate-bicarbonate buffer, pH 9.0

For this buffer two solutions were prepared: For 0.1 M sodium carbonate solution 2.1 g sodium carbonate (Merck, Darmstadt, Germany) was dissolved in 200 mL bidistilled water and for a 0.1 M sodium hydrogen carbonate solution 1.7 g sodium hydrogen carbonate (Merck, Darmstadt, Germany) was dissolved in 200 mL bidistilled water. For the buffer 10 mL of a 0.1 M Na<sub>2</sub>CO<sub>3</sub>-solution was mixed with 115 mL of a 0.1 M NaHCO<sub>3</sub> dilution. 375 mL bidistilled water was added as to get a final volume of 500 mL.

*Buffer IV:* Iodination buffer

The iodination buffer consisted of 100 mL of buffer II to which 0.01 mol NaI (Fluka, Buchs, Switzerland) was added and stored in the refrigerator. Aliquots of 250 µL were used for iodination only.

*p-SCN-Bn-DOTA stock solution*

2 mg *p*-SCN-Bn-DOTA (Macrocyclics, Dallas, USA) was dissolved in 0.5 mL buffer I. This stock solution should be controlled frequently or produced freshly because *p*-SCN-Bn-DOTA tends to hydrolyze. Aliquots of 125 µL (909 nmol) were only used for complexation.

*Lanthanide stock solutions*

3.664 mg EuCl<sub>3</sub>·6 H<sub>2</sub>O (Sigma-Aldrich, Deisenhofen, Germany), 2.699 mg HoCl<sub>3</sub>·6 H<sub>2</sub>O (Acros-Organics BVBA, Geel, Belgium), 3.734 mg TbCl<sub>3</sub> (Acros-Organics BVBA, Geel, Belgium) and 2.752 mg TmCl<sub>3</sub> (Acros-Organics BVBA, Geel, Belgium) were dissolved each in 1 mL of buffer I. 1 µL of these stock solutions is equivalent to 10 nmol europium, holmium, thulium and terbium, respectively.

---

**Table 2 (ESI):** Working conditions for ICP-MS instruments

|                                                                                                |                                                                                                                                                                                                         |
|------------------------------------------------------------------------------------------------|---------------------------------------------------------------------------------------------------------------------------------------------------------------------------------------------------------|
| ICP System<br>Conditions used for pneumatic<br>nebulisation                                    |                                                                                                                                                                                                         |
| Instrument                                                                                     | VG PQ3                                                                                                                                                                                                  |
| Forward power                                                                                  | 1370 W                                                                                                                                                                                                  |
| Auxiliary gas flow                                                                             | 1.3 L min <sup>-1</sup>                                                                                                                                                                                 |
| Coolant gas flow                                                                               | 13 L min <sup>-1</sup>                                                                                                                                                                                  |
| Nebuliser (Meinhard) gas flow                                                                  | 0.9 L min <sup>-1</sup>                                                                                                                                                                                 |
| Isotopes monitored                                                                             | <sup>153</sup> Eu <sup>+</sup> , <sup>140</sup> Ce <sup>+</sup>                                                                                                                                         |
| ELEMENT 2 (Thermo Fisher<br>Scientific, Bremen, Germany)<br>Conditions used for laser ablation |                                                                                                                                                                                                         |
| Incident power                                                                                 | 1,025 W                                                                                                                                                                                                 |
| Cooling gas flow rate                                                                          | 16 L min <sup>-1</sup>                                                                                                                                                                                  |
| Auxiliary gas flow rate                                                                        | 1.3 L min <sup>-1</sup>                                                                                                                                                                                 |
| Make-up gas flow rate                                                                          | 1 L min <sup>-1</sup>                                                                                                                                                                                   |
| Resolution setting                                                                             | 400, (4,000)                                                                                                                                                                                            |
| Isotopes monitored                                                                             | <sup>153</sup> Eu <sup>+</sup> , <sup>165</sup> Ho <sup>+</sup> ,<br><sup>159</sup> Tb <sup>+</sup> , <sup>169</sup> Tm <sup>+</sup> , <sup>127</sup> I <sup>+</sup> , ( <sup>13</sup> C <sup>+</sup> ) |
| Make-up gas flow rate, Ar                                                                      | 1 L min <sup>-1</sup>                                                                                                                                                                                   |
| Carrier gas flow rate, He                                                                      | 1.6 L min <sup>-1</sup>                                                                                                                                                                                 |
| Repetition rate                                                                                | 15 shots per second, Hz                                                                                                                                                                                 |
| Translation velocity                                                                           | 1 mm s <sup>-1</sup>                                                                                                                                                                                    |
| Distance between line scans                                                                    | 1 mm                                                                                                                                                                                                    |

**Table 3 (ESI):** Electric scan conditions for the "Element 2" ICP-MS instrument

| E-Scan                                        |                      |                      |                      |
|-----------------------------------------------|----------------------|----------------------|----------------------|
| Isotope                                       | Tb159                | Ho165                | Tm169                |
| Accurate mass                                 | 158.9248             | 164.9298             | 168.9337             |
| Mass window                                   | 90                   | 90                   | 90                   |
| Mass range                                    | 158.686 –<br>159.163 | 164.682 –<br>165.177 | 168.680 –<br>169.187 |
| Magnet mass                                   | 158.925              | 158.925              | 158.925              |
| Settling time                                 | 0.001                | 0.001                | 0.001                |
| Sample time                                   | 0.0035               | 0.0035               | 0.0035               |
| Samples per peak                              | 10                   | 10                   | 10                   |
| Segment duration                              | 0.032                | 0.032                | 0.032                |
| Search window                                 | 90                   | 90                   | 90                   |
| Integration<br>window                         | 80                   | 80                   | 80                   |
| Total time (per pass and res.)<br>[h:min:sec] | 00:01:14             |                      |                      |
